# Supplementary material for: Seasonal behaviour of tidal damping and residual water level slope in the Yangtze River estuary: identifying the critical position and river discharge for maximum tidal damping
Source: Copernicus journal article supplement (doi:10.5194/hess-23-2779-2019), 2019-07-01
Supplement: Supplementary file 1 [file hess-23-2779-2019-supplement.pdf]

Supplement of Hydrol. Earth Syst. Sci., 23, 2779–2794, 2019  
<https://doi.org/10.5194/hess-23-2779-2019-supplement>  
© Author(s) 2019. This work is distributed under  
the Creative Commons Attribution 4.0 License.

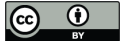

*Supplement of*

**Seasonal behaviour of tidal damping and residual water level slope in the Yangtze River estuary: identifying the critical position and river discharge for maximum tidal damping**

**Huayang Cai et al.**

*Correspondence to:* Feng Liu (liuf53@mail.sysu.edu.cn)

The copyright of individual parts of the supplement might differ from the CC BY 4.0 License.

## Contents

### 1. Figures S1 to S4

#### Introduction

Figures S1-S3 show the seasonal behavior of the velocity number  $\mu$ , the celerity number  $\lambda$  and the phase lag  $\varepsilon$  under a wide range of tidal and riverine forcing conditions in the Yangtze River estuary.

Figure S4 shows the seasonal behavior of the three components ( $S_t$ ,  $S_r$ ,  $S_{tr}$ ) that contribute to the development of the residual water level slope  $S$ .

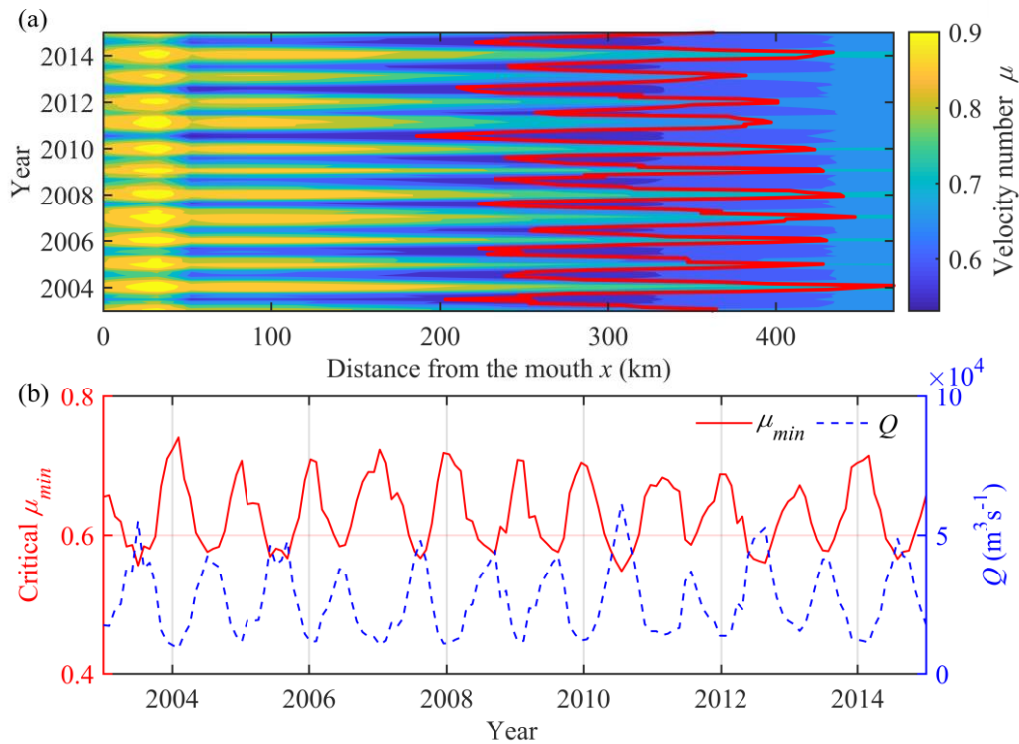

Figure S1. Contour plot of the velocity number  $\mu$  together with its minimum value  $\mu_{min}$  (indicated by the red line) for each month (a) and the relation between the critical value and the river discharge  $Q$  (b).

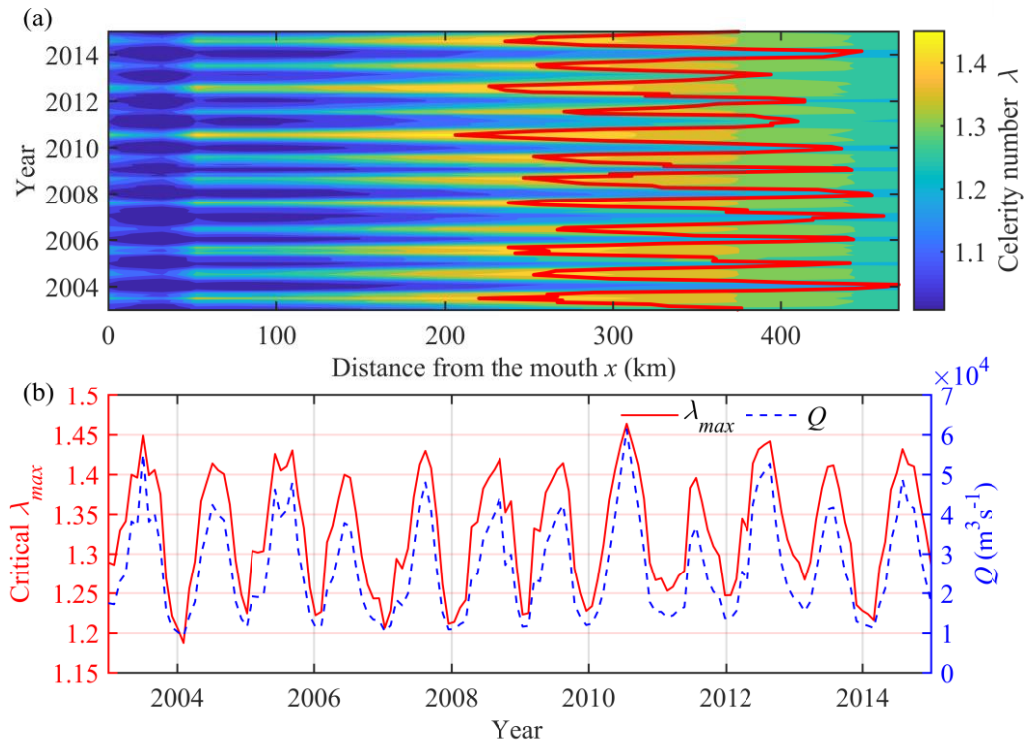

Figure S2. Contour plot of the celerity number  $\lambda$  together with its maximum value  $\lambda_{max}$  (indicated by the red line) for each month (a) and the relation between the critical value and the river discharge  $Q$  (b).

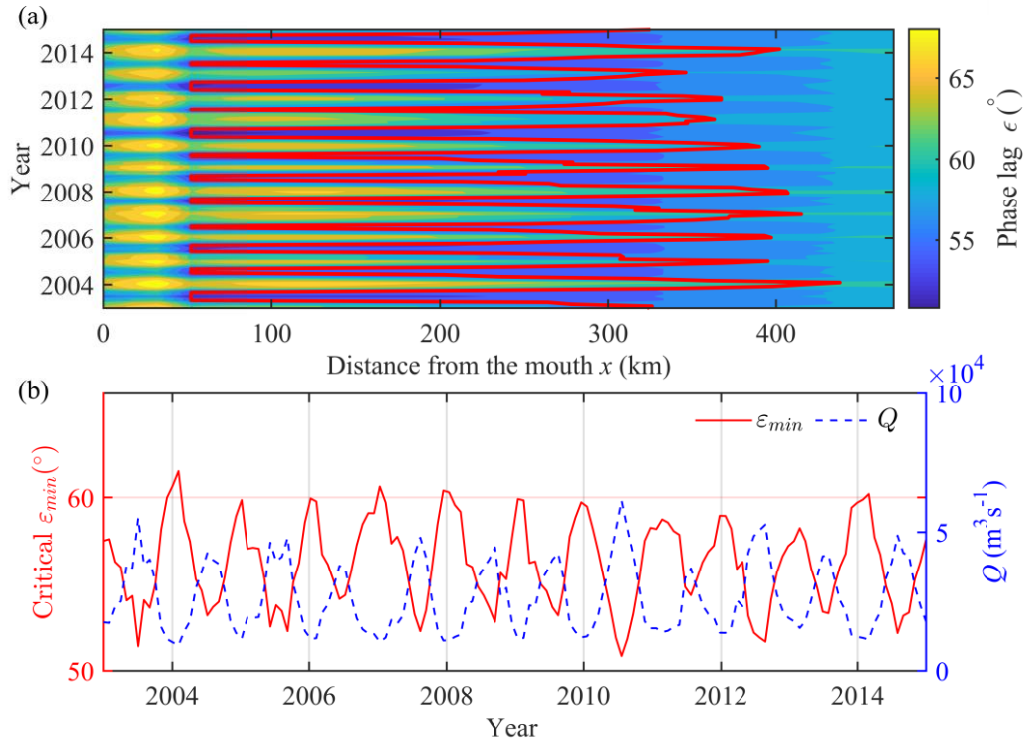

Figure S3. Contour plot of the phase lag  $\epsilon$  together with its minimum value  $\epsilon_{min}$  (indicated by the red line) for each month (a) and the relation between the critical value and the river discharge  $Q$  (b).

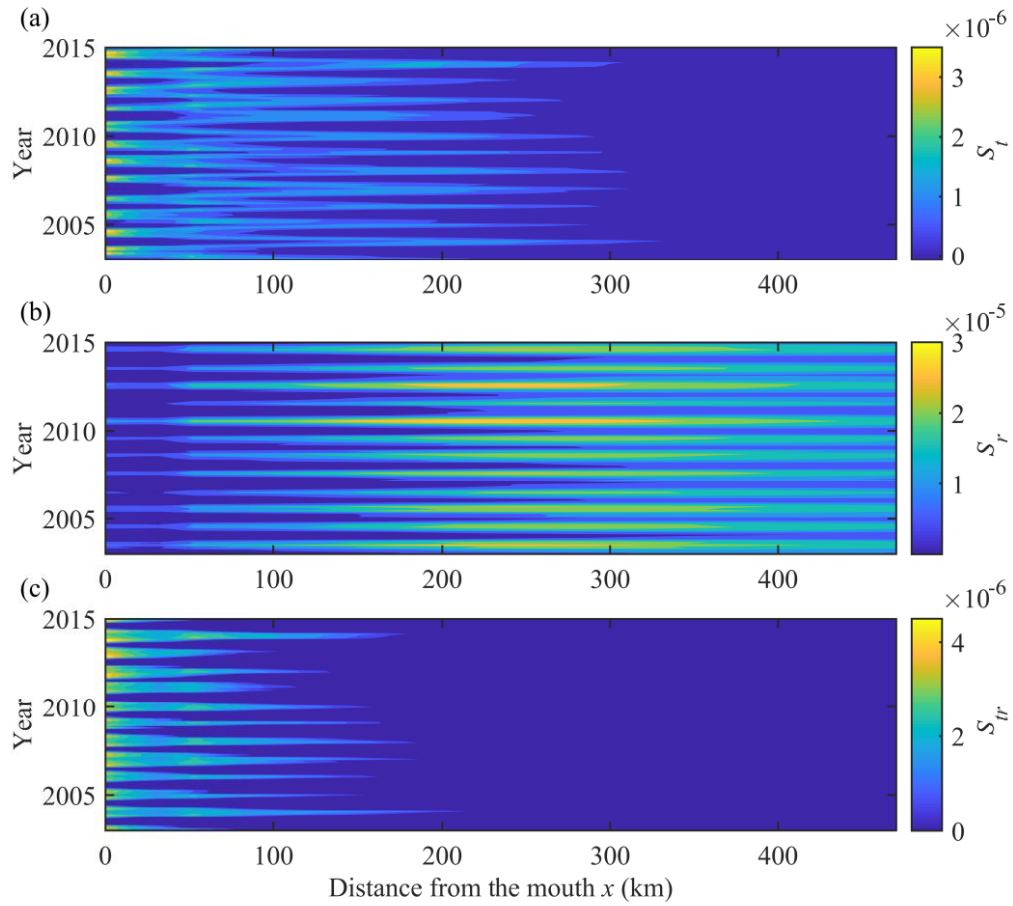

Figure S4. Contour plot of the three contributions made to the residual water level slope: tidal component  $S_t$  (a), riverine component  $S_r$  (b), tide-river interaction component  $S_{tr}$  (c).
